# Supplementary material
Source: Springer Nature journal article supplement (https://www.springermedizin.de/resource/supplementary/12974_2014_978_MOESM5_ESM.pdf/9600560)

A

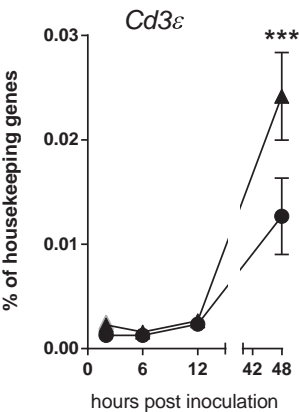

B

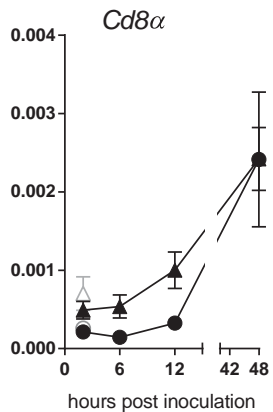

C

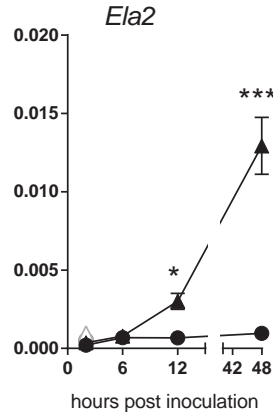

D

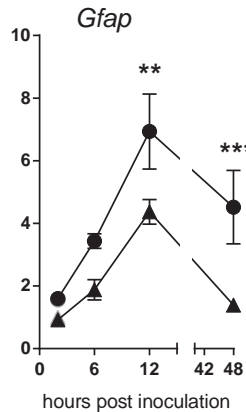

E

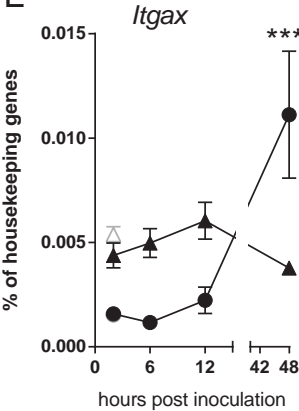

F

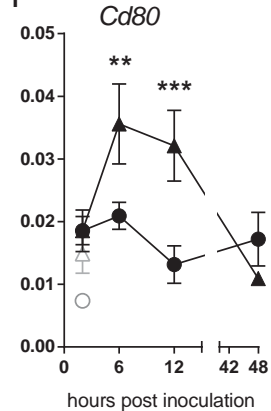

G

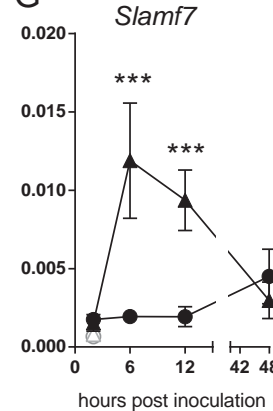

△ neonate, PBS  
 ▲ neonate, LPS  
 ○ weanling, PBS  
 ● weanling, LPS

Supplement: MOESM5 [file 9600560]
